# Supplementary material for: MiR-182-5p Modulates Prostate Cancer Aggressive Phenotypes by Targeting EMT Associated Pathways
Source: MDPI journal article supplement (doi:10.3390/biom12020187), 2022-01-22
Supplement: s1 [file s1]

Supplementary Table S1: Genes validated by strong methods\*

| miR-182-5p      |                 |                  |
|-----------------|-----------------|------------------|
| miRTarBase (A)  | TarBase v.8 (B) | Intersection AxB |
| <i>ADCY6</i>    | <i>ADCY6</i>    | <i>ADCY6</i>     |
| <i>ANUBL1</i>   | <i>ATF1</i>     | <i>ATF1</i>      |
| <i>ARRDC3</i>   | <i>BCL2</i>     | <i>BCL2</i>      |
| <i>ATF1</i>     | <i>BRCA1</i>    | <i>CCND2</i>     |
| <i>BARD1</i>    | <i>CCND1</i>    | <i>CDKN1B</i>    |
| <i>BCL2</i>     | <i>CCND2</i>    | <i>CHEK2</i>     |
| <i>BDNF</i>     | <i>CDK4</i>     | <i>CLOCK</i>     |
| <i>CADM1</i>    | <i>CDKN1B</i>   | <i>CREB5</i>     |
| <i>CCND2</i>    | <i>CHEK2</i>    | <i>FLOT1</i>     |
| <i>CDKN1A</i>   | <i>CLOCK</i>    | <i>FOXF2</i>     |
| <i>CDKN1B</i>   | <i>CREB5</i>    | <i>FOXO1</i>     |
| <i>CHEK2</i>    | <i>E2F1</i>     | <i>MITF</i>      |
| <i>CHL1</i>     | <i>FLOT1</i>    | <i>MTSS1</i>     |
| <i>CLOCK</i>    | <i>FOXF2</i>    | <i>PFN1</i>      |
| <i>CREB1</i>    | <i>FOXO1</i>    | <i>RAD17</i>     |
| <i>CREB5</i>    | <i>MITF</i>     | <i>RECK</i>      |
| <i>CYLD</i>     | <i>MTSS1</i>    | <i>SATB2</i>     |
| <i>FBXW7</i>    | <i>NFKB1B</i>   | <i>SMAD4</i>     |
| <i>FGF9</i>     | <i>PFN1</i>     | <i>SMARCD3</i>   |
| <i>FLOT1</i>    | <i>RAD17</i>    | <i>SNAI2</i>     |
| <i>FOXF2</i>    | <i>RECK</i>     | <i>TP53BP1</i>   |
| <i>FOXO1</i>    | <i>SATB2</i>    | <i>TSC22D3</i>   |
| <i>FOXO3</i>    | <i>SMAD4</i>    |                  |
| <i>GSK3B</i>    | <i>SMARCD3</i>  |                  |
| <i>LRRC4</i>    | <i>SNAI2</i>    |                  |
| <i>MITF</i>     | <i>TP53BP1</i>  |                  |
| <i>MTSS1</i>    | <i>TSC22D3</i>  |                  |
| <i>NDRG1</i>    | <i>ZFAND4</i>   |                  |
| <i>NTM</i>      |                 |                  |
| <i>PDCD4</i>    |                 |                  |
| <i>PFN1</i>     |                 |                  |
| <i>PTEN</i>     |                 |                  |
| <i>RAD17</i>    |                 |                  |
| <i>RARG</i>     |                 |                  |
| <i>RECK</i>     |                 |                  |
| <i>SATB2</i>    |                 |                  |
| <i>SMAD4</i>    |                 |                  |
| <i>SMARCD3</i>  |                 |                  |
| <i>SNAI2</i>    |                 |                  |
| <i>TCEAL7</i>   |                 |                  |
| <i>THBS1</i>    |                 |                  |
| <i>TP53BP1</i>  |                 |                  |
| <i>TP53INP1</i> |                 |                  |
| <i>TSC22D3</i>  |                 |                  |
| <i>ULBP2</i>    |                 |                  |

\*Luciferase; Western Blot; RT-qPCR

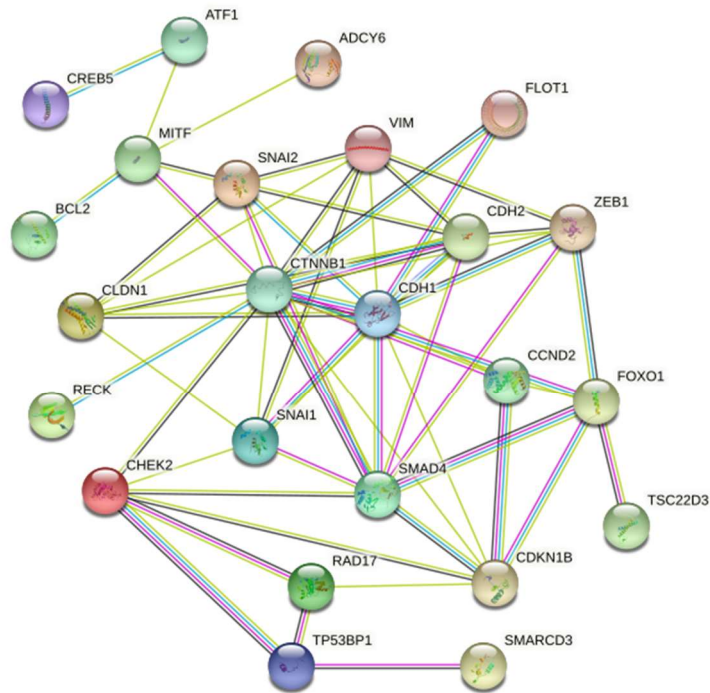

**Supplementary Figure S1.** Protein-protein interaction (PPI) analysis. Interaction of miR-182-5p target genes (validated by strong experimental methods) identified by the intersection of miRTarBase and TarBase v8 databases. The genes associated with EMT function (*CDH1*, *CDH2*, *CLDN1*, *CTNNB1*, *ZEB1*, *SNAI1*, *SNAI2*, *VIM*), evaluated in this study, were also added to the network.
